# Supplementary material for: Impact of CodY protein on metabolism, sporulation and virulence in Clostridioides difficile ribotype 027
Source: PubMed Central journal article supplement (PMC6353076; doi:10.1371/journal.pone.0206896), 2019-01-30
Supplement: pone.0206896.s005.pdf [file pone.0206896.s005.pdf]

## S1 Table. X-ray Data Collection and Refinement Statistics.

**CodY C. difficile** (1-156)  
PDB Code 5N0L

### Data collection

|                                                               |                                                                         |
|---------------------------------------------------------------|-------------------------------------------------------------------------|
| X-ray source                                                  | DLS beamline i02                                                        |
| Wavelength (Å)                                                | 0.97949                                                                 |
| Collection Temperature (K)                                    | 100                                                                     |
| Resolution range (Å)                                          | 56.19 - 1.68                                                            |
| Space group                                                   | P2 <sub>1</sub> 2 <sub>1</sub> 2                                        |
| Unit-cell parameters (Å, °)                                   | $a = 120.89, b = 190.39, c = 43.51$<br>$\alpha = \beta = \gamma = 90.0$ |
| Matthews coefficient/solvent content (%)                      | 2.44 / 49.6                                                             |
| Number of unique reflections overall/outer shell <sup>a</sup> | 115,569 / 8,396                                                         |
| Completeness (%), overall/outer shell <sup>a</sup>            | 100.0 / 99.9                                                            |
| $I/\sigma(I)$ , overall/outer shell <sup>a</sup>              | 17.1 / 1.2                                                              |
| $R_{\text{merge}}^b$ , overall/outer shell <sup>a</sup>       | 0.067 / 1.814                                                           |
| $CC_{1/2}^h$                                                  | 0.999 / 0.515                                                           |

### Refinement and model statistics

|                                                                 |                 |
|-----------------------------------------------------------------|-----------------|
| $R$ -factor <sup>c</sup> ( $R$ -free <sup>d</sup> )             | 0.162 (0.230)   |
| Reflections (working/free)                                      | 109,833 / 5,726 |
| Outer shell $R$ -factor <sup>c</sup> ( $R$ -free <sup>d</sup> ) | 0.312 (0.375)   |
| Outer shell reflections (working/free)                          | 7981 / 408      |
| Molecules/asymmetric unit                                       | 6               |
| Number of protein non hydrogen atoms                            | 8,141           |
| R.m.s. deviation from target <sup>f</sup>                       |                 |
| Bond lengths (Å)                                                | 0.027           |
| Bond angles (°)                                                 | 2.808           |
| Average $B$ -factor (Å <sup>2</sup> )                           | 38.21           |
| Ramachandran plot <sup>g</sup>                                  | 96.8/2.9/0.4    |

<sup>a</sup>The outer shell corresponds to 1.72 – 1.68 Å

<sup>b</sup> $R_{\text{merge}} = \frac{\sum_{hkl} \sum_i |I_i - \langle I \rangle|}{\sum_{hkl} \sum_i \langle I \rangle}$  where  $I_i$  is the intensity of the  $i$ th measurement of a reflection with indexes  $hkl$  and  $\langle I \rangle$  is the *STATISTICALLY WEIGHTED AVERAGE REFLECTION INTENSITY*.

<sup>c</sup> $R$ -factor =  $\frac{\sum ||F_o| - |F_c||}{\sum |F_o|}$  where  $F_o$  and  $F_c$  are the observed and calculated structure factor amplitudes, respectively.

<sup>d</sup> $R$ -free is the  $R$ -factor calculated with 5 % of the reflections chosen at random and omitted from refinement.

<sup>e</sup>Outer shell for refinement corresponds to 1.680 – 1.724 Å

<sup>f</sup>Root-mean-square deviation of bond lengths and bond angles from ideal geometry.

<sup>g</sup>Percentage of residues in preferred regions/ allowed regions/ outliers.

<sup>h</sup> $CC_{1/2}$  is the correlation coefficient between two randomly selected half data sets as described in Karplus & Diederichs (2012)
